# Supplementary material for: Retrospective Assessment of Greenhouse Gas Emissions from the Beef Sector in Greece and Potential Mitigation Scenarios
Source: MDPI journal article supplement (doi:10.3390/environments10080144), 2023-08-13
Supplement: s1 [file s1]

Archive with 3 entries (3 files):
- Supplementary File S1.xlsx
- Supplementary File S2_.xlsx
- Supplementary File S3_GE.pdf
