# Supplementary material for: Retrospective Assessment of Greenhouse Gas Emissions from the Beef Sector in Greece and Potential Mitigation Scenarios
Source: MDPI journal article supplement (doi:10.3390/environments10080144), 2023-08-13
Supplement: s1 [file s1 › Supplementary File S1.xlsx]

## Sheet: Table S1 NATIONAL LEVEL
Table S1: Animals number (beef cattle; heads) reared in Greece between 2011-2021.
YEAR	2011	2012	2013	2014	2015	2016	2017	2018	2019	2020	2021
Male <1 months old	7979	6810	7005	7313	5472	6303	5602	5699	7740	6901	7105
Female <1 months old	7076	5790	5801	6132	4833	5314	4615	5372	6612	6996	5932
Male 1-6 months old	26059	37362	28682	30250	29875	33204	32438	34013	35437	39161	37293
Female 1-6 months old	19470	18713	22840	24544	25238	27608	26836	27244	28967	33240	31148
Male 6-24 months old	81877	77271	63472	66636	71877	75101	79316	81435	89984	95394	110842
Female 6-24 months old	50617	51819	49006	44357	61121	64232	69313	73920	77350	85503	105524
Male 2-6 years old	19777	5936	18565	20070	22154	24845	23103	22325	24776	27429	31318
Female 2-6 years old	107942	106449	94262	101212	102833	113832	116319	119447	128377	134707	146470
Male >6 years old	4830	5434	8364	8575	11491	11253	8756	6585	6739	7268	8047
Female >6 years old	118733	123247	146681	155331	161208	163959	154485	149546	123413	156713	166423
Total	444360	438831	444678	464420	496102	525651	520783	525586	529395	593312	650102

## Sheet: Table S2 PREFECTURE LEVEL
		Table S2: Animals number (beef cattle; heads) at the prefecture level (regional) during the examined years (2011,2016,2021)
		2011	Male <2 months old	Male >6 years old	Male 2-6 months old	Male 2-6 years old	Male 6-24 months old	Female <2 months old	Female >6 years old	Female 2-6 months old	Female 2-6 years old	Female 6-24 months old
	Perfecture	East Macedonia & Thrace	1285	350	5165	2802	12700	1155	15871	4678	20004	9675
		Attica	37	1	61	25	133	12	77	8	81	69
		North Aegean	122	55	320	403	1390	68	1990	221	1146	889
		Western Greece	367	1816	1876	5086	4884	396	21538	1805	12465	4739
		Western Macedonia	250	125	1229	634	3957	231	4643	1263	6050	2879
		Epirus	1064	625	1701	2091	4357	1032	19458	1619	13301	5955
		Thessaly	2342	680	6511	2324	14284	2063	27223	5176	27084	12156
		Ionian Islands	2	114	81	353	649	1	1211	89	729	287
		Central Macedonia	1421	275	6403	3501	30038	1159	14579	2724	17130	8686
		Crete	12	5	50	106	787	0	90	19	122	123
		South Aegean	72	279	609	317	2244	54	1203	251	822	554
		Peloponnese	321	163	798	913	2707	215	3445	581	2969	1529
		Central Greece	684	342	1255	1222	3747	690	7405	1036	6039	3076
		2016	Male <1 months old	Male >6 years old	Male 1-6 months old	Male 2-6 years old	Male 6-24 months old	Female <1 months old	Female >6 years old	Female 1-6 months old	Female 2-6 years old	Female 6-24 months old
	Perfecture	East Macedonia & Thrace	858	579	5765	2924	9465	767	22320	5241	18607	9990
		Attica	6	2	3	12	91	5	46	4	29	40
		North Aegean	87	199	359	343	1173	84	2053	321	1359	905
		Western Greece	343	4912	2298	4942	7110	456	28321	5407	11248	8905
		Western Macedonia	356	112	2233	825	3738	350	7460	2227	7173	4031
		Epirus	941	1202	3025	3076	5104	1022	25446	3109	15769	7214
		Thessaly	1391	1124	8724	3381	17813	1261	39502	7763	29056	17786
		Ionian Islands	33	375	140	297	452	12	1810	108	473	275
		Central Macedonia	1612	664	7496	5412	23231	811	20463	3681	16931	9605
		Crete	2	35	31	128	361	3	110	17	85	80
		South Aegean	147	688	644	663	1802	42	1440	223	945	736
		Peloponnese	114	569	812	1215	2100	90	4956	701	3155	1592
		Central Greece	413	792	1674	1627	2661	411	10032	3281	4527	3073
		2021	Male <1 months old	Male >6 years old	Male 1-6 months old	Male 2-6 years old	Male 6-24 months old	Female <1 months old	Female >6 years old	Female 1-6 months old	Female 2-6 years old	Female 6-24 months old
	Perfecture	East Macedonia & Thrace	842	535	5364	3355	11244	753	21071	4869	18128	11498
		Attica	0	9	2	21	54	0	52	0	33	11
		North Aegean	55	132	354	374	999	74	1759	284	1302	811
		Western Greece	623	3023	2691	6391	11288	759	28278	3474	21293	16242
		Western Macedonia	542	168	2298	1704	5336	525	9221	2296	9865	6410
		Epirus	1006	1136	4199	4145	10669	1018	26550	4382	22897	16186
		Thessaly	1561	1013	10084	5322	27256	1405	42735	9161	41537	31799
		Ionian Islands	45	248	61	373	333	33	1540	58	735	329
		Central Macedonia	1741	494	8669	5435	33551	784	19324	3932	17828	13854
		Crete	2	108	45	759	910	0	114	6	143	206
		South Aegean	164	134	895	375	2504	45	1157	188	680	518
		Peloponnese	70	395	766	838	2479	66	4430	638	3817	2554
		Central Greece	454	652	1865	2226	4219	470	10192	1860	8212	5106

## Sheet: Table S3
	Table S3: Total GHG emissions per beef head (Gg CO2-eq) and per Kg of beef carcass during the period 2011 -2021
	Year	Gg CO2-eq / head		Kg CO2-eq / Kg produced beef carcass		produced beef carcass	slaughtered animals
		Tier 1	Tier 2	Tier 1	Tier 2	(tn/year)*	(heads)*
	2011	0.00112	0.00104	7.16	6.6	69816.9	338436
	2012	0.00102	0.0009	6.45	5.68	69463	330412
	2013	0.00115	0.00108	7.45	6.99	68746.1	335054
	2014	0.00116	0.00109	10.94	10.32	49216.2	220720
	2015	0.00115	0.00108	14.55	13.69	39199	173254
	2016	0.00115	0.00108	15.4	14.48	39171.6	169341
	2017	0.00114	0.00106	14.17	13.18	41766	184234
	2018	0.00113	0.00104	14.93	13.76	39640	166290
	2019	0.00011	0.001	17.45	15.89	33470	144450
	2020	0.00111	0.00102	19.02	17.43	34740	144590
	2021	0.00112	0.00101	21.79	19.93	33050	140400
	* FAOSTAT. Food and Agricultural Organization of the United Nations ( https://www.fao.org/faostat/en/#data/QCL ; accessed on 2 July 2023).

## Sheet: Table S4
	Table S4: Total GHG emissions (Gg CO2-eq) for each animal category estimated by using Tier 1 and 2 methodologies during the period 2011-2021
	Category / Year	2011		2012		2013		2014		2015		2016		2017		2018		2019		2020		2021
		Tier 1	Tier 2	Tier 1	Tier 2	Tier 1	Tier 2	Tier 1	Tier 2	Tier 1	Tier 2	Tier 1	Tier 2	Tier 1	Tier 2	Tier 1	Tier 2	Tier 1	Tier 2	Tier 1	Tier 2	Tier 1	Tier 2
	Adult Males	35.37	49.9	61.52	86.78	38.71	54.61	41.18	58.09	48.37	68.23	51.89	73.2	45.8	64.61	41.56	58.63	45.3	63.91	49.88	70.36	56.59	79.83
	Adult Females	325.86	338.42	204.08	211.95	346.37	359.73	368.8	383.02	379.58	394.21	399.34	414.74	389.3	404.31	386.69	401.6	361.96	375.92	418.93	435.09	449.8	467.15
	Replacement animals	41.63	21.53	54.79	26.29	38.13	19.49	38.65	19.88	42.79	21.74	45.66	23.21	47.03	23.88	49.1	24.88	53.07	26.97	57.62	29.18	64.23	32.45
	Fatening animals	96.96	50.62	127.59	69.51	88.79	46.67	90	47.14	99.64	52.57	106.34	56.1	109.53	57.81	114.33	60.41	65.19	65.19	134.18	70.93	149.57	79.18
