# Supplementary material for: Retrospective Assessment of Greenhouse Gas Emissions from the Beef Sector in Greece and Potential Mitigation Scenarios
Source: MDPI journal article supplement (doi:10.3390/environments10080144), 2023-08-13
Supplement: s1 [file s1 › Supplementary File S2_.xlsx]

## Sheet: BEEF_TIER
	Azoukis et al. (2023). Retrospective Assessment of Greenhouse Gas Emissions from the Beef Sector in Greece and Potential Mitigation Scenarios
	Laboratory of Animal Breeding and Husbandry, Department of Animal Science, Agricultural University of Athens
	75 Iera Odos, GR11855 Athens, Greece. Correspondending author: glaliotis@aua.gr (Dr George P. Laliotis)
	Supplementary File 2: Excel application for estimating GHG emissions of beef sector using Tier 1 and Tier 2 equations
	Methane emissions from enteric fermentation	Tier 1															Methane emissions from enteric fermentation	Tier 2
	Livestock category	Number livestocks	Days alive	NT	TIER 1: Gg CH4	Tier 1: Gg CO2		GHG	GPW-100		INFORMETION						Livestock category	Live weight kg	Activity coefficients corresponding to animal’s feeding situation: Ca	Cfi (MJ /D/Kg)	METHANE CONVERSION FACTORS: Ym	Feed quality Digestibility: DE	a=(NEm+NEl+NEp+NEw)/(REM), for GE	b=(NEg+NEwool)/(REG), for GE	(a+b)/DE, for GE	[ GE ]	NEm	NEa	Milk (kg)/day	Fat (%) milk	NEl	NEp	BW(Kg)	C	MW	Average daily weight gain of the animals	NEg	NEwork	NEwool	REM	REG	EF	TIER 2: Kg CH4	TIER 2: Gg CO2
	Male (a)			0	0	0		Carbon dioxide [CO2 ]	1		For Beef (Non-Dairy) Cattle						Male (a)						#DIV/0!	#DIV/0!	#DIV/0!	0	0	0			0	0	0					0	0	0	0	0	0	0
	Male (b)			0	0	0		Methane [CH4]	25								Male (b)						#DIV/0!	#DIV/0!	#DIV/0!	0	0	0			0	0	0					0	0	0	0	0	0	0
	Female (a)			0	0	0		Nitrous oxide [N2O]	298		INPUT: (data entry from user)						Female (a)						#DIV/0!	#DIV/0!	#DIV/0!	0	0	0			0	0	0					0	0	0	0	0	0	0
	Female (b)			0	0	0											Female (b)						#DIV/0!	#DIV/0!	#DIV/0!	0	0	0			0	0	0					0	0	0	0	0	0	0
	Replacement female (a)			0	0	0					Read-only cells						Replacement female (a)						#DIV/0!	#DIV/0!	#DIV/0!	0		0					0		0		0	0	0	0	0	0	0	0
	Replacement female (b)			0	0	0											Replacement female (b)						#DIV/0!	#DIV/0!	#DIV/0!	0		0					0		0		0	0	0	0	0	0	0	0
	Replacement male (a)			0	0	0					Results (each category)						Replacement male (a)						#DIV/0!	#DIV/0!	#DIV/0!	0		0					0		0		0	0	0	0	0	0	0	0
	Replacementmale (b)			0	0	0											Replacementmale (b)						#DIV/0!	#DIV/0!	#DIV/0!	0		0					0		0		0	0	0	0	0	0	0	0
	Fattening female (a)			0	0	0					Results (Total)						Fattening female (a)						#DIV/0!	#DIV/0!	#DIV/0!	0		0					0		0		0	0	0	0	0	0	0	0
	Fattening male (a)			0	0	0											Fattening male (a)						#DIV/0!	#DIV/0!	#DIV/0!	0		0					0		0		0	0	0	0	0	0	0	0
	Fattening female (b)			0	0	0											Fattening female (b)						#DIV/0!	#DIV/0!	#DIV/0!	0		0					0		0		0	0	0	0	0	0	0	0
	Fattening male (b)			0	0	0											Fattening male (b)						#DIV/0!	#DIV/0!	#DIV/0!	0		0					0		0		0	0	0	0	0	0	0	0
				TOTAL :	0	0																																				TOTAL:	0	0
	Methane emissions from manure management	Tier 1															Methane emissions from manure management	Tier 2
																						manure system											MCF for EF		CH4 from manure management system			manure system portion		CH4 from 100% solid storage	CH4 from solid storage+ pasture
	Livestock category	NT	TAM	VS(rate)	VS(T,P)	AWMS(T,S,P) (%)	EFT,S,P	TIER 1: Gg CH4	Tier 1: Gg CO2								Livestock category	NT	VS(T,P)	AWMS (%)	B0(T)	MCF_solid storage	MCF_pasture/range	AWMS (%)	GE	DE	UE*GE	ASH	c = GE(1-DE/100), for VS	d=UE*GE, for VS	e = (1-ASH)/18.45, for VS	VS=(c+d)*e	MCF_solid storage	MCF_pasture/range	solid storage	pasture/range	(%) Pasture/Range	% solid storage	% pasture/range	100% solid storage	solide storage + pasture/range	TIER 2: Kg CH4	Tier 2: Gg CO2
	Male (a)	0			0			0	0								Male (a)	0	0						0	0	0		0	0	0.0542005	0	0	0	0	0		1	0	0	0	0	0
	Male (b)	0						0	0								Male (b)	0							0	0	0		0	0	0.0542005	0	0	0	0	0		1	0	0	0	0	0
	Female (a)	0						0	0								Female (a)	0							0	0	0		0	0	0.0542005	0	0	0	0	0		1	0	0	0	0	0
	Female (b)	0						0	0								Female (b)	0							0	0	0		0	0	0.0542005	0	0	0	0	0		1	0	0	0	0	0
	Replacement female (a)	0						0	0								Replacement female (a)	0							0	0	0		0	0	0.0542005	0	0	0	0	0		1	0	0	0	0	0
	Replacement female (b)	0						0	0								Replacement female (b)	0							0	0	0		0	0	0.0542005	0	0	0	0	0		1	0	0	0	0	0
	Replacement male (a)	0						0	0								Replacement male (a)	0							0	0	0		0	0	0.0542005	0	0	0	0	0		1	0	0	0	0	0
	Replacementmale (b)	0						0	0								Replacementmale (b)	0							0	0	0		0	0	0.0542005	0	0	0	0	0		1	0	0	0	0	0
	Fattening female (a)	0						0	0								Fattening female (a)	0							0	0	0		0	0	0.0542005	0	0	0	0	0		1	0	0	0	0	0
	Fattening male (a)	0						0	0								Fattening male (a)	0							0	0	0		0	0	0.0542005	0	0	0	0	0		1	0	0	0	0	0
	Fattening female (b)	0						0	0								Fattening female (b)	0							0	0	0		0	0	0.0542005	0	0	0	0	0		1	0	0	0	0	0
	Fattening male (b)	0						0	0								Fattening male (b)	0							0	0	0		0	0	0.0542005	0	0	0	0	0		1	0	0	0	0	0
							TOTAL:	0	0																																TOTAL:	0	0
	Direct N2O emission from manure management	Tier 1															Direct N2O emission from manure management	Tier 2
	Livestock category	NT	Nrate(T,P)	TAM(T,P)	Nex(T,P)	AWMS(T,S,P) (%)	Ncdg(s)	EF3(S)	Tier 1: kg N2OD(mm)	Tier 1: Gg CO2							Livestock category	NT	GE	CP%	Nintake(T)	Nretention_frac(T)	Nex(T,P)	AWMS(T,S,P) (%)	Ncdg(s)	EF3(S)	Tier 1: kg N2OD(mm)	Tier 2: Gg CO2
	Male (a)	0			0				0	0							Male (a)	0	0		0		0				0	0
	Male (b)	0							0	0							Male (b)	0	0		0		0				0	0
	Female (a)	0							0	0							Female (a)	0	0		0		0				0	0
	Female (b)	0							0	0							Female (b)	0	0		0		0				0	0
	Replacement female (a)	0							0	0							Replacement female (a)	0	0		0		0				0	0
	Replacement female (b)	0							0	0							Replacement female (b)	0	0		0		0				0	0
	Replacement male (a)	0							0	0							Replacement male (a)	0	0		0		0				0	0
	Replacementmale (b)	0							0	0							Replacementmale (b)	0	0		0		0				0	0
	Fattening female (a)	0							0	0							Fattening female (a)	0	0		0		0				0	0
	Fattening male (a)	0							0	0							Fattening male (a)	0	0		0		0				0	0
	Fattening female (b)	0							0	0							Fattening female (b)	0	0		0		0				0	0
	Fattening male (b)	0							0	0							Fattening male (b)	0	0		0		0				0	0
								TOTAL:	0	0																TOTAL:	0	0
	Indirect N2O emission from manure management	Tier 1 & 2
	INDIRECT N2O EMISSIONS DUE TO VOLATILISATION OF N FROM MANURE MANAGEMENT
	Livestock category	NT	Nex(T,P) (Tier 1)	Nex(T,P) (Tier 2)	AWMS(T,S,P) (%)	Ncdg(s)	FracGasMS(T,S)	Tier 1:Nvolatilisation-MMS	Tier 2: Nvolatilisation-MMS	EF4	Tier 1: N2O G(mm)	Tier 2: N2O G(mm)
	Male (a)	0	0	0				0	0		0	0
	Male (b)	0		0				0	0		0	0
	Female (a)	0		0				0	0		0	0
	Female (b)	0		0				0	0		0	0
	Replacement female (a)	0		0				0	0		0	0
	Replacement female (b)	0		0				0	0		0	0
	Replacement male (a)	0		0				0	0		0	0
	Replacementmale (b)	0		0				0	0		0	0
	Fattening female (a)	0		0				0	0		0	0
	Fattening male (a)	0		0				0	0		0	0
	Fattening female (b)	0		0				0	0		0	0
	Fattening male (b)	0		0				0	0		0	0
										TOTAL:	0	0
	INDIRECT N2O EMISSIONS DUE TO LEACHING FROM MANURE MANAGEMENT
	Livestock category	NT	Nex(T,P) (Tier 1)	Nex(T,P) (Tier 2)	AWMS(T,S,P) (%)	Ncdg(s)	Frac leach_MS	Tier 1: Nleaching--MMS	Tier 2: Nleaching--MMS	EF5	Tier 1: N2O L(mm)	Tier 2: N2O L(mm)	Tier 1: Gg CO2	Tier 2: Gg CO2
	Male (a)	0	0	0				0	0		0	0	0	0
	Male (b)	0		0				0	0		0	0	0	0
	Female (a)	0		0				0	0		0	0	0	0
	Female (b)	0		0				0	0		0	0	0	0
	Replacement female (a)	0		0				0	0		0	0	0	0
	Replacement female (b)	0		0				0	0		0	0	0	0
	Replacement male (a)	0		0				0	0		0	0	0	0
	Replacementmale (b)	0		0				0	0		0	0	0	0
	Fattening female (a)	0		0				0	0		0	0	0	0
	Fattening male (a)	0		0				0	0		0	0	0	0
	Fattening female (b)	0		0				0	0		0	0	0	0
	Fattening male (b)	0		0				0	0		0	0	0	0
										TOTAL:	0	0	0	0
